# Supplementary material for: Targeted Lipidomics and Inflammation Response to Six Weeks of Sprint Interval Training in Male Adolescents
Source: MDPI journal article supplement (doi:10.3390/ijerph20043329), 2023-02-14
Supplement: s1 [file s1]

**Table S1. Fold-change of differential serum lipids pre- and post-sprint interval training**

| Lipid Categories          | Sub Class                          | Lipid Name              | Fold Change | <i>p</i> -Value |
|---------------------------|------------------------------------|-------------------------|-------------|-----------------|
| Fatty Acyls (FA)          | Saturated Fatty Acids (SFA)        | Myristic acid           | 0.68        | 0.012           |
|                           |                                    | Eicosapentaenoic acid   | 0.29        | 0.004           |
|                           |                                    | Docosatrienoic acid     | 0.50        | 0.030           |
|                           |                                    | Tetradecenoic acid      | 0.58        | 0.025           |
|                           |                                    | Octadecatetraenoic acid | 0.60        | 0.031           |
|                           | Unsaturated Fatty Acids (UFA)      | Dodecenoic acid         | 0.62        | 0.042           |
|                           |                                    | Docosahexaenoic acid    | 0.62        | 0.001           |
|                           |                                    | Hexadecadienoic acid    | 0.63        | 0.019           |
|                           |                                    | Eicosatetraenoic acid   | 0.64        | 0.008           |
|                           |                                    | Docosapentaenoic acid   | 0.66        | 0.004           |
|                           |                                    | Octadecatrienoic acid   | 0.67        | 0.032           |
| Glycerolipids (GL)        | Monoacylglycerols (MG)             | MG 22:5                 | 1.29        | 0.047           |
|                           |                                    | DG 18:1_18:3            | 0.60        | 0.024           |
|                           |                                    | DG 16:0_18:0            | 1.29        | 0.023           |
|                           | Diacylglycerols (DG)               | DG 16:0_16:0            | 1.37        | 0.016           |
|                           |                                    | DG 14:0_16:0            | 1.40        | 0.008           |
|                           |                                    | DG 18:0_18:0            | 1.42        | 0.013           |
|                           |                                    | DG 16:1_18:2            | 1.64        | 0.031           |
|                           | Triacylglycerol (TG)               | TG 52:2                 | 1.23        | 0.034           |
|                           |                                    | TG 54:2                 | 1.45        | 0.002           |
|                           |                                    | TG 50:0                 | 1.46        | 0.007           |
|                           |                                    | TG 54:1                 | 1.58        | 0.003           |
| Glycerophospholipids (GP) | Phosphatidylinositol (PI)          | PI 20:0/20:4*           | 0.57        | 0.015           |
|                           |                                    | PI 18:0/18:0            | 1.36        | 0.015           |
|                           |                                    | PI 16:0/18:0*           | 1.40        | 0.044           |
|                           | Lysophosphatidylcholine (LPC)      | LPC 20:0                | 0.76        | 0.018           |
| Sphingolipis (SP)         | Lysophosphatidylethanolamine (LPE) | LPE 18:2                | 0.56        | 0.048           |
|                           |                                    |                         |             |                 |
|                           | Ceramides (Cer)                    | Cer d18:1/18:1          | 1.26        | 0.006           |
|                           |                                    | Cer d18:1/16:0          | 1.37        | 0.017           |
|                           | Hexosylceramides (HexCer)          | HexCer d18:1/16:1       | 1.28        | 0.013           |
| Sterol lipids (ST)        | Cholesteryl ester (Chol. Esters)   | HexCer d18:1/14:0       | 1.38        | 0.011           |
|                           |                                    | HexCer d18:1/18:2       | 1.80        | 0.013           |
|                           |                                    | CE 18:2                 | 0.73        | 0.002           |
