# Supplementary material for: Targeted Lipidomics and Inflammation Response to Six Weeks of Sprint Interval Training in Male Adolescents
Source: MDPI journal article supplement (doi:10.3390/ijerph20043329), 2023-02-14
Supplement: s1 [file s1]

**Table S2. Spearman correlations between changes in differential serum lipids and inflammatory markers**

| Inflammatory Markers | Lipid Name                       | Correlation | <i>p</i> -Value |
|----------------------|----------------------------------|-------------|-----------------|
| CRP ↓                | HexCer d18:1/16:1 ↑              | 0.94        | 0.000           |
|                      | LPC 20:0 ↓                       | 0.73        | 0.007           |
|                      | HexCer d18:1/18:2 ↑              | 0.64        | 0.024           |
| IL-1β ↓              | HexCer d18:1/16:1 ↑              | 0.69        | 0.014           |
|                      | LPC 20:0 ↓                       | 0.60        | 0.038           |
| IL-2 ↓               | Docosahexaenoic acid(C22:6)      | 0.66        | 0.018           |
| IL-4 ↓               | HexCer d18:1/16:1 ↑              | 0.97        | 0.000           |
|                      | HexCer d18:1/18:2 ↑              | 0.82        | 0.001           |
|                      | LPC 20:0 ↓                       | 0.66        | 0.018           |
|                      | Eicosapentaenoic acid(C20:5) ↓   | 0.65        | 0.022           |
| IL-6 ↑               | LPE 18:2 ↓                       | -0.74       | 0.006           |
|                      | Cer d18:1/16:0 ↑                 | 0.71        | 0.010           |
|                      | DG 18:0_18:0 ↑                   | 0.69        | 0.014           |
|                      | Octadecatetraenoic acid(C18:4) ↓ | 0.64        | 0.026           |
|                      | MG 22:5 ↑                        | 0.59        | 0.045           |
| IL-10 ↓              | HexCer d18:1/16:1 ↑              | 0.66        | 0.020           |
|                      | Docosahexaenoic acid(C22:6) ↓    | 0.60        | 0.039           |
| TGF-β ↓              | HexCer d18:1/16:1 ↑              | 0.78        | 0.003           |
|                      | LPC 20:0 ↓                       | 0.61        | 0.036           |
| TNF-α ↓              | PI 18:0/18:0 ↑                   | 0.59        | 0.045           |
| IL-10/TNF-α ↑        | Docosahexaenoic acid(C22:6) ↓    | 0.69        | 0.013           |
